# Supplementary material
Source: HighWire-hosted journal article supplement (https://qdcxjkg.com/highwire/filestream/114416/field_highwire_adjunct_files/0/ERJ-01022-2014R2_on_line_supplement.pdf)

ON LINE SUPPLEMENT

**Maternal intakes of vitamin D and E during pregnancy are associated with childhood asthma at age 10.**

Keith M Allan,  
Nanda Prabhu,  
Leone CA Craig,  
Geraldine McNeill,  
Bradley Kirby,  
James McLay,  
Peter J Helms,  
Jon G Ayres,  
Anthony. Seaton,  
Stephen W Turner,  
Graham Devereux

## **METHODS**

Parents responding to the questionnaire were invited to complete an FFQ (version C2 SCG FFQ) to assess the study child's dietary intake over the previous three months.[1] Version C2 is a 140 item semi-quantitative FFQ based on the questionnaire used for the mothers, but modified to be appropriate for children aged 3-11 years.

Parents responding to the postal questionnaire were invited to bring the study child to the hospital for an assessment that included spirometry, methacholine responsiveness, skin prick testing and measurement of exhaled nitric oxide (FE<sub>NO</sub>).

### **Spirometry and bronchodilator response**

Spirometry was measured using a pneumotachograph (Spirotrac IV version 4.22, Vitalograph, UK) with on-screen incentive software. Spirometric values presented were the best from at least two technically acceptable expiratory manoeuvres where the ratio of back-extrapolated volume to FVC was less than 5%, there was a rapid rise to peak expiratory flow and smooth descent of the flow-volume curve, and forced expiratory time exceeded 0.5 seconds.[2]

### **Skin prick testing**

Skin prick reactivity to the allergens dog, cat, timothy grass, egg, peanut, and house dust mite (ALK Abello, Hungerford, UK) was determined. The negative control was 0.9% saline and the positive control was histamine 10mg/ml. A positive response was defined as a mean weal diameter 3mm or greater than the negative control 15 minutes after inoculation. Atopy was defined as at least one positive response.

### **Measurements of exhaled nitric oxide**

A NIOX® analyser (Aerocrine, Sweden) was used to measure FE<sub>NO</sub> after spirometry and bronchodilator response. FE<sub>NO</sub> was measured in accordance with International Guidelines.[3] Up to nine attempts were permitted [4] in order to obtain mean values from either two measurements within 5% or three within 10% of each other.[3]

### **Methacholine Responsiveness.**

A methacholine provocation study was conducted to quantify bronchial hyperresponsiveness.[5] Pharmaceutical quality methacholine solutions were obtained from the Pharmacy Department of Wythenshawe Hospital, Manchester, UK. These had been prepared in sterile conditions, under procedures of quality assurance, under a Medicines and Healthcare products Regulatory Agency (MHRA) license. Solutions were sent ready prepared at required concentrations.

Concentrations of 0.0625, 0.25, 1.0, 4.0, 16.0 mg/ml (representing cumulative doses of 0.003, 0.014, 0.059, 0.239 and 0.959 mg/ml respectively) were nebulised using 5 characterised DeVilbiss 646 nebulisers connected to a KoKo dosimeter, run off medical air at 30 psi. The mode of the dosimeter was set to normal, the dose duration to 0.6 seconds, inhale time to 5 seconds, hold time to 5 seconds, dose count to 5 and series timer to 0.15 minutes.

The child was instructed to inhale slowly and deeply from the nebuliser and to then hold their breath for 5 seconds. Musical cues from the dosimeter prompted the child to hold their breath. This step was repeated until 5 inhalations had been performed in no more than three minutes.

The child's FEV<sub>1</sub> was measured 30 and 90 seconds after the last inhalation. Provided that both of these manoeuvres were technically acceptable, the lowest FEV<sub>1</sub> was recorded. This was repeated with increasing concentrations of methacholine until the child's FEV<sub>1</sub> fell by  $\geq 20\%$  or the highest concentration of methacholine was administered.

The test was deemed to be positive if a child's FEV<sub>1</sub> fell by 20% or more of their recorded baseline spirometry. The test was stopped at the occurrence of a positive reaction or once spirometry had been gained after exposure to the final dose of methacholine.

Any bronchoconstriction was reversed by the administration of 400  $\mu\text{g}$  albuterol administered via a large volume spacer and recovery of FEV<sub>1</sub> was confirmed by spirometry 15 minutes later. to assess recovery.

Airway responsiveness was expressed as the dose required to induce a 20% decrease in FEV<sub>1</sub> and as a percentage dose response slope (%decline in FEV<sub>1</sub> post challenge / Total cumulative methacholine dose).

## REFERENCES

1. Craig LCA, McNeill G, Macdiarmid JI, Masson LF. Dietary patterns of school-age children in Scotland: association with socio-economic indicators, physical activity and obesity. *Br J Nutr* 2010;103:319-334.
2. Aurora P, Stocks J, Oliver C, Saunders C, Castle R, Chaziparasidis G, Bush A. Quality control for spirometry in preschool children with and without lung disease. *Am J Respir Crit Care Med* 2004;169:1152-9.
3. ATS/ERS Recommendations for Standardized Procedures for the Online and Offline Measurement of Exhaled Lower Respiratory Nitric Oxide and Nasal Nitric Oxide. *Am J Respir Crit Care Med* 2005;171:912-930.
4. Napier E, Turner SW. Methodological issues related to exhaled nitric oxide measurement in children aged four to six years. *Pediatr Pulmonol* 2005;37:24-30.
5. Guidelines for Methacholine and Exercise Challenge Testing 1999. *Am J Respir Crit Care Med* 2000;161:309-329.

Table E1 Characteristics of mothers at recruitment, and those who brought their child for clinical assessment.

|                                             | All mothers of singleton child | Clinical assessment    |        |
|---------------------------------------------|--------------------------------|------------------------|--------|
|                                             | n=1924                         | n=449                  | P**    |
| <i>Maternal</i>                             |                                |                        |        |
| Age at recruitment (median, IQR)            | 29<br>(26,33)                  | 31<br>(24,32)          | <0.001 |
| Current smoker at recruitment n(%)          | 566 (29.4%)                    | 75 (16.7%)             | <0.001 |
| SIMD at recruitment Median (IQR)            | 8.86<br>(5.30,16.78)           | 7.21<br>(5.42,18.6)    | <0.001 |
| Age left full time education (Mean, 95% CI) | 18.3<br>(18.1,18.4)            | 18.8<br>(18.6,19.1)    | <0.001 |
| Ever wheeze n(%)                            | 708 (36.8%)                    | 141 (31.4%)            | 0.007  |
| Asthma ever n(%)                            | 316 (16.4%)                    | 64 (14.3%)             | 0.161  |
| Atopy n(%)                                  | 689 (35.8%)                    | 168 (37.5%)            | 0.400  |
| First pregnancy n(%)                        | 656 (35.8%)                    | 154 (36.1%)            | 0.907  |
| FFQ returned n(%)                           | 1717 (89.2%)                   | 440 (98%)              | <0.001 |
| Dietary supplements (%)                     | 44.7%                          | 44.0%                  | 0.733  |
| Vitamin D intake µg/d (GM, 95% CI)          | 3.60<br>(3.50,3.71)            | 3.62<br>(3.42,3.82)    | 0.817  |
| Vitamin E intake mg/d (GM, 95% CI)          | 8.20<br>(8.10,8.39)            | 7.95<br>(7.64,8.27)    | 0.110  |
| Plasma α.tocopherol mg/l (GM, 95% CI)       | 9.68<br>(9.54,9.82)            | 9.66<br>(9.35,9.98)    | 0.982  |
| Vitamin C intake mg/d (GM, 95% CI)          | 119<br>(116-122)               | 123<br>(118-129)       | 0.109  |
| Plasma ascorbate µmol/l (GM, 95% CI)        | 61.2<br>(59.8-62.8)            | 67.8<br>(65.1-70.6)    | <0.001 |
| Beta carotene intake mg/d (GM, 95% CI)      | 1.84<br>(1.77-1.90)            | 1.87<br>(1.76-1.99)    | 0.591  |
| Plasma beta-carotene mg/l (GM, 95% CI)      | 0.254<br>(0.246-0.263)         | 0.296<br>(0.278-0.314) | <0.001 |
| <i>Child</i>                                |                                |                        |        |
| Girl n(%)                                   | 956 (49.7%)                    | 241 (53.8%)            | 0.046  |
| Birth weight g Median (IQR)                 | 3460<br>(3090,3797)            | 3530<br>(3168,3830)    | 0.013  |

\*GM = geometric mean

\*\*p value: responders vs non responders,  $\chi^2$ , Mann-Whitney, t-tests.

Table E2: Associations between total maternal vitamin D intake during pregnancy and eczema and hayfever outcomes in ten year old children.

|                                           | Quintiles of energy adjusted maternal vitamin D intake.<br>Adjusted odds ratio (95% CI)* |                     |                     |                     |                     | p trend |
|-------------------------------------------|------------------------------------------------------------------------------------------|---------------------|---------------------|---------------------|---------------------|---------|
|                                           | Q1<br>Low                                                                                | Q2                  | Q3                  | Q4                  | Q5<br>High          |         |
| Postal questionnaire (n=934)              |                                                                                          |                     |                     |                     |                     |         |
| Ever eczema                               | 1                                                                                        | 0.78<br>(0.49-1.25) | 0.82<br>(0.52-1.31) | 1.08<br>(0.69-1.68) | 1.01<br>(0.65-1.57) | 0.466   |
| Doctor confirmed eczema                   | 1                                                                                        | 0.64<br>(0.39-1.04) | 0.76<br>(0.47-1.23) | 1.00<br>(0.63-1.58) | 0.81<br>(0.51-1.30) | 0.904   |
| Medication to treat eczema in last year   | 1                                                                                        | 1.00<br>(0.42-2.40) | 1.54<br>(0.69-2.44) | 1.91<br>(0.88-4.16) | 1.20<br>(0.52-2.77) | 0.278   |
|                                           |                                                                                          |                     |                     |                     |                     |         |
| Ever hayfever                             | 1                                                                                        | 1.11<br>(0.69-1.78) | 1.00<br>(0.62-1.62) | 0.65<br>(0.40-1.07) | 0.99<br>(0.62-1.58) | 0.336   |
| Doctor confirmed hayfever                 | 1                                                                                        | 0.94<br>(0.51-1.75) | 0.86<br>(0.46-1.60) | 0.71<br>(0.38-1.34) | 0.96<br>(0.53-1.75) | 0.629   |
| Medication to treat hayfever in last year | 1                                                                                        | 1.09<br>(0.65-1.82) | 0.91<br>(0.54-1.53) | 0.65<br>(0.37-1.12) | 1.20<br>(0.73-2.00) | 0.993   |
|                                           |                                                                                          |                     |                     |                     |                     |         |
| Longitudinal (1,2,5,10 year data)         |                                                                                          |                     |                     |                     |                     |         |
| Eczema <sup>+</sup>                       | 1                                                                                        | 1.01<br>(0.80-1.28) | 0.94<br>(0.74-1.19) | 0.97<br>(0.76-1.24) | 1.01<br>(0.79-1.28) | 0.922   |
| Hayfever <sup>+</sup>                     | 1                                                                                        | 1.06<br>(0.82-1.36) | 0.90<br>(0.70-1.17) | 0.91<br>(0.70-1.18) | 0.97<br>(0.75-1.26) | 0.481   |

\*adjusted for maternal smoking during pregnancy, maternal atopy, birth order, child's sex, maternal age at recruitment, Scottish Index of Multiple Deprivation, birth weight, birth crown-heel length, birth head circumference, maternal vitamin E intake.

\*\*Generalised estimating equations

+Discrete hazards modelling, hazard ratio

Tables E3: Associations between (a) total maternal vitamin E intake and (b) plasma  $\alpha$ -tocopherol during pregnancy and eczema and hayfever outcomes in ten year old children.

| (a)                                       | Quintiles of energy adjusted maternal vitamin E intake. |                     |                     |                     |                     | p trend |
|-------------------------------------------|---------------------------------------------------------|---------------------|---------------------|---------------------|---------------------|---------|
|                                           | Adjusted odds ratio (95% CI)*                           |                     |                     |                     |                     |         |
|                                           | Q1<br>Low                                               | Q2                  | Q3                  | Q4                  | Q5<br>High          |         |
| Postal questionnaire (n=934)              |                                                         |                     |                     |                     |                     |         |
| Ever eczema                               | 1                                                       | 0.74<br>(0.47-1.17) | 1.26<br>(0.81-1.98) | 0.99<br>(0.63-1.56) | 0.96<br>(0.62-1.50) | 0.674   |
| Doctor confirmed eczema                   | 1                                                       | 0.80<br>(0.49-1.30) | 1.15<br>(0.72-1.84) | 1.01<br>(0.63-1.63) | 0.87<br>(0.54-1.40) | 0.93    |
| Medication to treat eczema in last year   | 1                                                       | 0.25<br>(0.09-0.69) | 1.36<br>(0.68-2.71) | 0.85<br>(0.40-1.79) | 0.73<br>(0.34-1.56) | 0.809   |
| Ever hayfever                             |                                                         |                     |                     |                     |                     |         |
| Ever hayfever                             | 1                                                       | 1.08<br>(0.67-1.74) | 1.05<br>(0.65-1.70) | 1.08<br>(0.67-1.75) | 1.19<br>(0.74-1.90) | 0.510   |
| Doctor confirmed hayfever                 | 1                                                       | 0.97<br>(0.51-1.85) | 1.01<br>(0.53-1.94) | 1.22<br>(0.65-2.29) | 1.21<br>(0.65-2.26) | 0.371   |
| Medication to treat hayfever in last year | 1                                                       | 1.10<br>(0.59-1.71) | 1.08<br>(0.64-1.83) | 0.99<br>(0.58-1.69) | 1.11<br>(0.66-1.87) | 0.724   |
| Longitudinal (1,2,5,10 year data)         |                                                         |                     |                     |                     |                     |         |
| Eczema <sup>+</sup>                       | 1                                                       | 0.73<br>(0.48-1.10) | 1.04<br>(0.82-1.32) | 0.91<br>(0.71-1.16) | 0.95<br>(0.75-1.21) | 0.579   |
| Hayfever <sup>+</sup>                     | 1                                                       | 0.98<br>(0.76-1.28) | 0.82<br>(0.62-1.07) | 1.03<br>(0.80-1.33) | 0.93<br>(0.72-1.21) | 0.763   |

\*adjusted for maternal smoking during pregnancy, maternal atopy, birth order, child's sex, maternal age at recruitment, Scottish Index of Multiple Deprivation, birth weight, birth crown-heel length, birth head circumference, maternal vitamin D intake.

\*\*Generalised estimating equations

+Discrete hazards modelling, hazard ratio.



Tables E3: Associations between (a) total maternal vitamin E intake and (b) plasma  $\alpha$ -tocopherol during pregnancy and eczema and hayfever outcomes in ten year old children.

| (b)                                       | Maternal $\alpha$ -tocopherol ( $\mu\text{g/ml}$ ) |       |
|-------------------------------------------|----------------------------------------------------|-------|
|                                           | OR* <sup>§</sup> (95% CI                           | p     |
| Postal questionnaire (n=934)              |                                                    |       |
| Ever eczema                               | 0.71 (0.43-1.19)                                   | 0.198 |
| Doctor confirmed eczema                   | 0.74 (0.39-1.41)                                   | 0.365 |
| Medication to treat eczema in last year   | 1.10 (0.98-1.24)                                   | 0.122 |
|                                           |                                                    |       |
| Ever hayfever                             | 0.80 (0.37-1.71)                                   | 0.563 |
| Doctor confirmed hayfever                 | 0.58 (0.31-1.10)                                   | 0.096 |
| Medication to treat hayfever in last year | 1.04 (0.94-1.16)                                   | 0.429 |
|                                           |                                                    |       |
| Longitudinal (1,2,5,10 year data)         |                                                    |       |
| Eczema <sup>+</sup>                       | 1.03 (0.81-1.33)                                   | 0.800 |
| Hayfever <sup>+</sup>                     | 0.96 (0.73-1.26)                                   | 0.960 |

\*adjusted for maternal smoking during pregnancy, maternal atopy, birth order, child's sex, maternal age at recruitment, Scottish Index of Multiple Deprivation, birth weight, birth crown-heel length, birth head circumference, maternal vitamin D intake.

§ OR expressed per SD increase in  $\alpha$ -tocopherol, adjusted for plasma cholesterol

\*\*Generalised estimating equations

+Discrete hazards modelling, hazard ratio.

Table E4: Associations between the vitamin D intake of children at age ten and wheeze and asthma outcomes at age ten.

|                                           | Quintiles of energy adjusted children's vitamin D intake.<br>Adjusted odds ratio (95% CI)* |                     |                     |                     |                     | p trend |
|-------------------------------------------|--------------------------------------------------------------------------------------------|---------------------|---------------------|---------------------|---------------------|---------|
|                                           | Q1<br>Low                                                                                  | Q2                  | Q3                  | Q4                  | Q5<br>High          |         |
| Ever wheezed                              | 1                                                                                          | 0.96<br>(0.45-1.54) | 0.52<br>(0.26-1.02) | 0.77<br>(0.41-1.43) | 1.02<br>(0.56-1.85) | 0.962   |
| Wheeze in last year                       | 1                                                                                          | 0.80<br>(0.36-1.77) | 0.46<br>(0.19-1.16) | 0.42<br>(0.32-1.65) | 1.23<br>(0.58-2.58) | 0.630   |
| Wheezed in absence of a cold in last year | 1                                                                                          | 0.65<br>(0.26-1.66) | 0.47<br>(0.17-1.31) | 0.63<br>(0.24-1.63) | 1.15<br>(0.50-2.64) | 0.731   |
| Doctor confirmed asthma                   | 1                                                                                          | 0.69<br>(0.33-1.42) | 0.63<br>(0.30-1.32) | 0.57<br>(0.27-1.23) | 1.06<br>(0.54-2.08) | 0.999   |
| Asthma and wheeze in last year            | 1                                                                                          | 1.20<br>(0.47-3.04) | 0.60<br>(0.20-1.77) | 0.84<br>(0.31-2.29) | 1.65<br>(0.68-3.98) | 0.424   |

\*adjusted for maternal smoking during pregnancy, household smokers at age ten, maternal atopy, birth order, child's sex, maternal age at recruitment, Scottish Index of Multiple Deprivation, birth weight, birth crown-heel length, birth head circumference, children's vitamin E intake.

Table E5: Associations between the vitamin E intake of children at age ten and wheeze and asthma outcomes at age ten.

|                                           | Quintiles of energy adjusted children's vitamin E intake.<br>Adjusted odds ratio (95% CI)* |                     |                     |                     |                     | P trend |
|-------------------------------------------|--------------------------------------------------------------------------------------------|---------------------|---------------------|---------------------|---------------------|---------|
|                                           | Q1<br>Low                                                                                  | Q2                  | Q3                  | Q4                  | Q5<br>High          |         |
| Ever wheezed                              | 1                                                                                          | 0.62<br>(0.33-1.16) | 0.83<br>(0.45-1.52) | 0.54<br>(0.28-1.03) | 0.88<br>(0.49-1.60) | 0.590   |
| Wheeze in last year                       | 1                                                                                          | 0.67<br>(0.30-1.49) | 0.31<br>(0.12-0.83) | 0.52<br>(0.27-1.39) | 1.20<br>(0.59-2.43) | 0.630   |
| Wheezed in absence of a cold in last year | 1                                                                                          | 0.70<br>(0.29-1.66) | 0.27<br>(0.09-0.87) | 0.48<br>(0.18-1.26) | 1.00<br>(0.44-2.23) | 0.786   |
| Doctor confirmed asthma                   | 1                                                                                          | 1.30<br>(0.64-2.62) | 0.62<br>(0.28-1.41) | 0.76<br>(0.35-1.66) | 1.51<br>(0.76-3.01) | 0.602   |
| Asthma and wheeze in last year            | 1                                                                                          | 1.23<br>(0.50-3.07) | 0.40<br>(0.12-1.32) | 0.85<br>(0.32-2.28) | 1.81<br>(0.78-4.22) | 0.267   |

\*adjusted for maternal smoking during pregnancy, household smokers at age ten, maternal atopy, birth order, child's sex, maternal age at recruitment, Scottish Index of Multiple Deprivation, birth weight, birth crown-heel length, birth head circumference, children's vitamin D intake.

Figure E1: Maternal vitamin D and E intakes dichotomised about the median, proportions of children with parental report of doctor confirmed asthma in the first ten years.

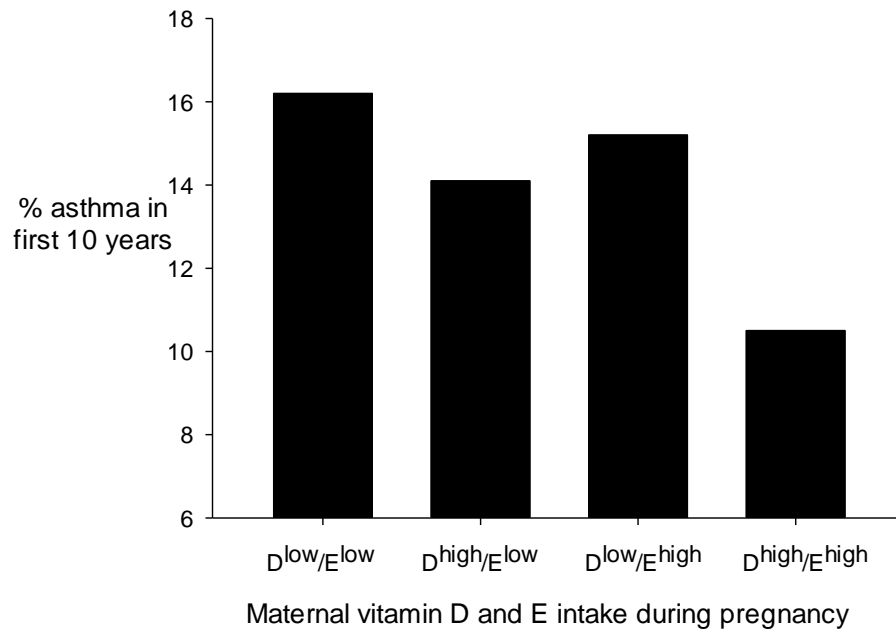

Supplement: ERJ-01022-2014R2_on_line_supplement.pdf [file ERJ-01022-2014R2_on_line_supplement.pdf]
